# Supplementary material for: Facile one-pot synthesis of high-purity sodium antimony chalcogenides in polar solvents
Source: Royal Society of Chemistry journal article supplement (doi:10.1039/d4qi02941k), 2024-12-04
Supplement: d4qi02941k1.pdf [file d4qi02941k1.pdf]

## Supporting Information

# Facile One-pot Synthesis of Sodium Ternary Chalcogenides for Energy Conversion and Storage Applications

*Saeed Ahmadi Vaselabadi<sup>a</sup>, Brynn Benham<sup>a</sup>, Colin A. Wolden, <sup>a, \*</sup>*

<sup>a</sup> Chemical and Biological Engineering, Colorado School of Mines, Golden, CO

\* Email: cwolden@mines.edu

## Contents

|                                                                                                                                          |    |
|------------------------------------------------------------------------------------------------------------------------------------------|----|
| Scheme S1 Standard “two-pot” Na <sub>3</sub> SbS <sub>4</sub> reaction in ethanol.....                                                   | 2  |
| Figure S1 Product analysis of Na <sub>3</sub> SbS <sub>4</sub> one-pot reaction with chloride salt .....                                 | 2  |
| Figure S2 Rietveld analysis of Na <sub>3</sub> SbS <sub>4</sub> one-pot reaction with bromide salt .....                                 | 3  |
| Figure S3 Supernatant composition of Na <sub>3</sub> SbS <sub>4</sub> one-pot reaction .....                                             | 3  |
| Figure S4 EDAX analysis of Na <sub>3</sub> SbS <sub>4</sub> .....                                                                        | 4  |
| Figure S5 FTIR analysis of Na <sub>3</sub> SbS <sub>4</sub> .....                                                                        | 4  |
| Scheme S2 Standard “two-pot” Na <sub>3</sub> SbSe <sub>4</sub> reaction in ethanol .....                                                 | 5  |
| Scheme S3: Possible decomposition reactions in ethanolic Se solutions .....                                                              | 5  |
| Figure S6 XRD analysis of Na <sub>3</sub> SbSe <sub>4</sub> one-pot supernatant .....                                                    | 6  |
| Figure S7 Raman analysis of Na <sub>3</sub> SbSe <sub>4</sub> one-pot products .....                                                     | 6  |
| Figure S8 Na <sub>3</sub> SbSe <sub>4</sub> reaction using Na <sub>2</sub> Se <sub>2</sub> precursor .....                               | 7  |
| Figure S9 XRD analysis of Na <sub>3</sub> SbSe <sub>4</sub> reaction with no basic agent.....                                            | 7  |
| Figure S10 Lattice structure of Na <sub>3</sub> SbSe <sub>4</sub> .....                                                                  | 8  |
| Figure S11 EDAX Mapping of Na <sub>3</sub> SbSe <sub>4</sub> .....                                                                       | 8  |
| Figure S12 FTIR analysis of RT and heat-treated Na <sub>3</sub> SbSe <sub>4</sub> .....                                                  | 9  |
| Figure S13 Electronic conductivity of Na <sub>3</sub> SbCh <sub>4</sub> .....                                                            | 9  |
| Figure S14 Raman analysis of NaSbS <sub>2</sub> .....                                                                                    | 9  |
| Figure S15 Morphological analysis of NaSbS <sub>2</sub> .....                                                                            | 10 |
| Figure S16 XRD and EDAX analysis of one-pot NaSbSe <sub>2</sub> .....                                                                    | 10 |
| NaBiCh <sub>2</sub> (Ch= S, Se) Synthesis and Structural Characterization .....                                                          | 11 |
| Table S1 Fitting results of EIS spectra of synthesized Na <sub>3</sub> SbCh <sub>4</sub> .....                                           | 12 |
| Table S2 Summary of solution-phase synthesis of ternary chalcogenides.....                                                               | 12 |
| Table S3 Summary of synthesis parameters and performance reports of Na <sub>3</sub> SbCh <sub>4</sub> (Ch= S, Se) in the literature..... | 13 |
| References .....                                                                                                                         | 14 |

### Scheme S1 Standard “two-pot” Na<sub>3</sub>SbS<sub>4</sub> reaction in ethanol

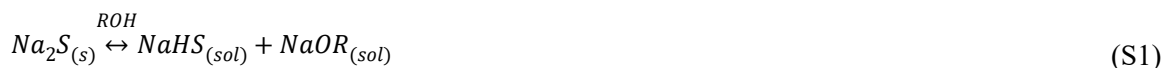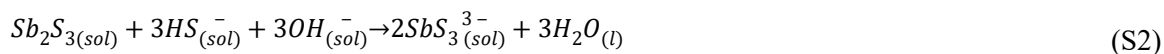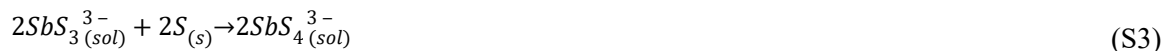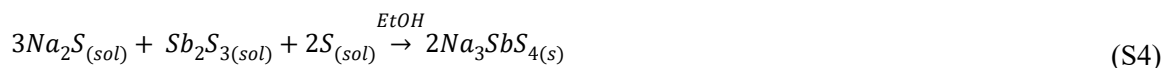

### Figure S1 Product analysis of Na<sub>3</sub>SbS<sub>4</sub> one-pot reaction with chloride salt

Figure S1 displays the XRD patterns of single-step Na<sub>3</sub>SbS<sub>4</sub> solution synthesis in methanol using SbCl<sub>3</sub>. In the first attempt, the initial Na<sub>3</sub>SbS<sub>4</sub> concentration in MeOH was set to 0.15 M, and the powder was recovered after decanting and drying the precipitate under vacuum at RT. The XRD pattern of the obtained powder shows the presence of the tetragonal phase of Na<sub>3</sub>SbS<sub>4</sub>. A substantial trace of NaCl was also observed in the precipitate pattern. NaCl is highly soluble in methanol (1.375 g/100 g methanol)<sup>1</sup>, so the remaining NaCl in the precipitate could be either due to the high concentration of precursors that led to the NaCl saturation or originated from insufficient washing steps.

Repeating this reaction with a lower concentration (0.075 M) and extra washing with MeOH addresses the NaCl separation but results in a drastically low ternary yield (~34%) due to the partial solubility of Na<sub>3</sub>SbS<sub>4</sub> in MeOH.<sup>2</sup> As a result, using a polar solvent with a comparable NaCl solubility as a washing reagent that could improve the yield while maintaining the purity of Na<sub>3</sub>SbS<sub>4</sub> seemed imperative. NaCl solubility in DMSO is relatively high (0.5 g/100 g DMSO) while DMSO is expected to have a lower dissolution capability of the ternary sulfides compared to MeOH due to its lower polarity. The initial yield for [Na<sub>3</sub>SbS<sub>4</sub>] = 0.15 M with DMSO as washing reagent is ~53% while XRD confirmed the high purity of the product. Increasing the reaction concentration improves the yield significantly; however, increases the consumption of costly DMSO washing solvent as the result rendering this system relatively inefficient in terms of processing cost and scalability (Figure S1b).

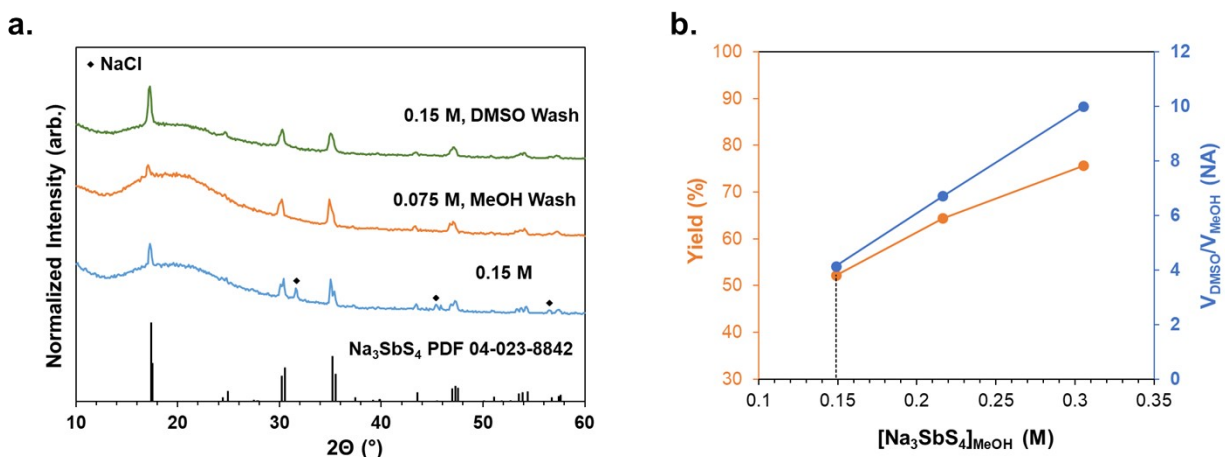

Figure S1 a. XRD patterns of Na<sub>3</sub>SbS<sub>4</sub> one-pot reaction with SbCl<sub>3</sub> reagent, b. Yield and volumetric ratio of washing

solvent (DMSO) to reaction solvents (MeOH) as a function of  $\text{Na}_3\text{SbS}_4$  initial concentration (M) in MeOH.

Figure S2 Rietveld analysis of  $\text{Na}_3\text{SbS}_4$  one-pot reaction with bromide salt

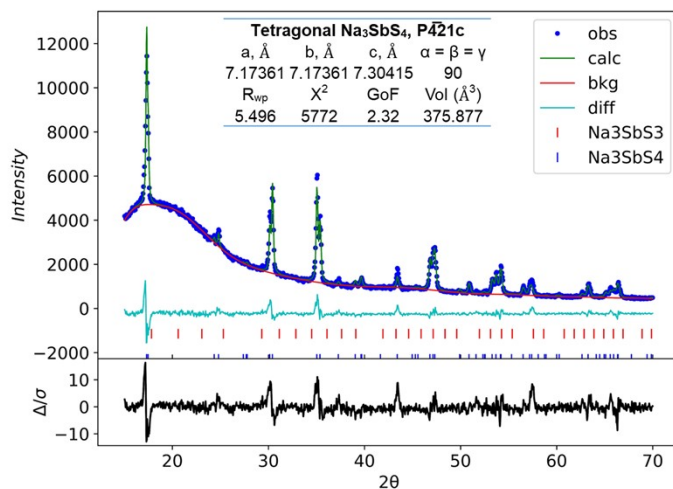

Figure S2 Rietveld refinement of  $\text{Na}_3\text{SbS}_4$  recovered from EtOH at RT. The inset shows the lattice parameters confirm the presence of  $\text{Na}_3\text{SbS}_4$  tetragonal phase with P421c space group.

Figure S3 Supernatant composition of  $\text{Na}_3\text{SbS}_4$  one-pot reaction

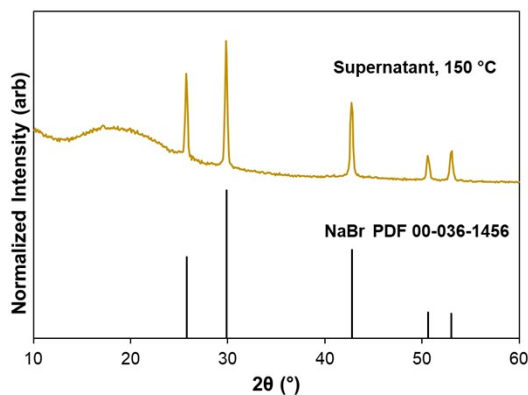

Figure S3 XRD pattern of supernatant recovered from  $\text{Na}_3\text{SbS}_4$  one-pot reaction with bromide halide.

Figure S4 EDAX analysis of  $\text{Na}_3\text{SbS}_4$

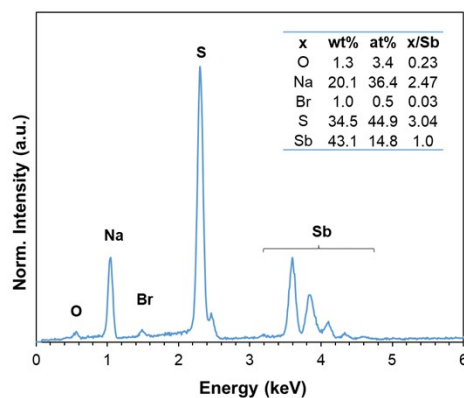

Figure S4 EDAX spectrum of one-pot  $\text{Na}_3\text{SbS}_4$  recovered at RT.

Figure S5 FTIR analysis of Na<sub>3</sub>SbS<sub>4</sub>

We used FTIR spectroscopy to identify any possible impurities from the obtained ternary sulfide. Figure S5 compares the IR spectra of RT and 150 °C with pure Na<sub>2</sub>S reagent and recovered Na<sub>2</sub>S from EtOH solution. Small traces of organic residues (C-H and O-H bonds) observed in the RT sample from the ethanolic solution are mostly removed after the mild heat treatment at 150 °C. The lack of major peaks from precipitated ethanolic Na<sub>2</sub>S indicates that most of the NaHS and EtONa formed from Na<sub>2</sub>S dissolution are either consumed in the reaction or removed during washing steps. Since the stoichiometric amount of Na<sub>2</sub>S is sufficient to produce highly pure ternary sulfide with a considerable yield (~92-95%), we can assume that NaHS is the dominant reactive species in the Na<sub>2</sub>S solution

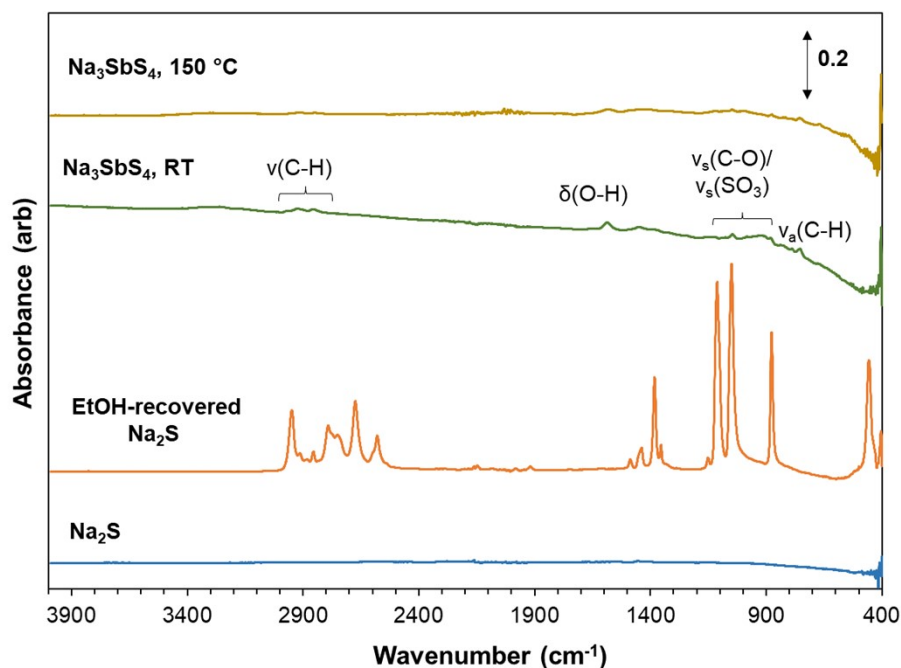

Figure S5 FTIR spectra of Na<sub>3</sub>SbS<sub>4</sub> recovered from the one-pot reaction with bromide salt at RT and dried at 150 °C compared with Na<sub>2</sub>S reagent and its ethanolic solution products.

#### Scheme S2 Standard “two-pot” Na<sub>3</sub>SbSe<sub>4</sub> reaction in ethanol

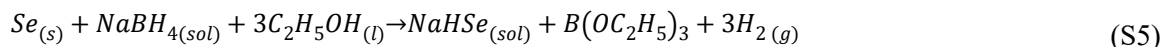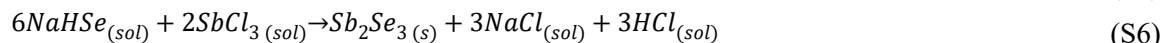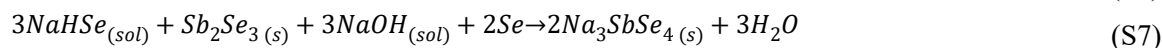

#### Scheme S3: Possible decomposition reactions in ethanolic Se solutions

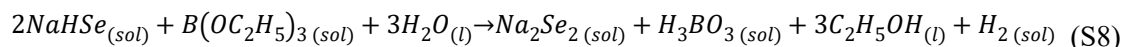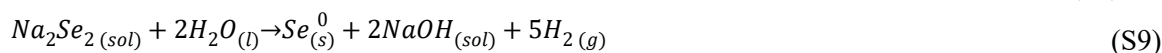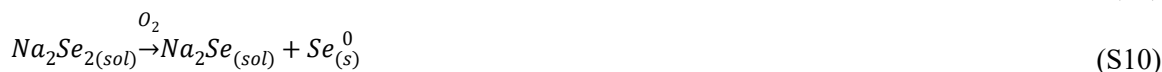

Figure S6 XRD analysis of  $\text{Na}_3\text{SbSe}_4$  one-pot supernatant

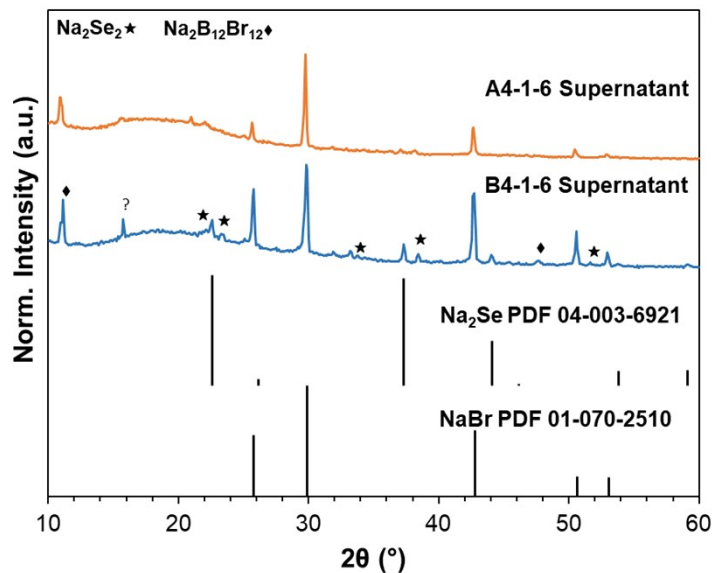

Figure S6 XRD patterns of supernatant from A4-2-6 and B4-2-6 samples. Supernatant powders are obtained after drying at 120 °C under Ar flow.

Figure S7 Raman analysis of  $\text{Na}_3\text{SbSe}_4$  one-pot products

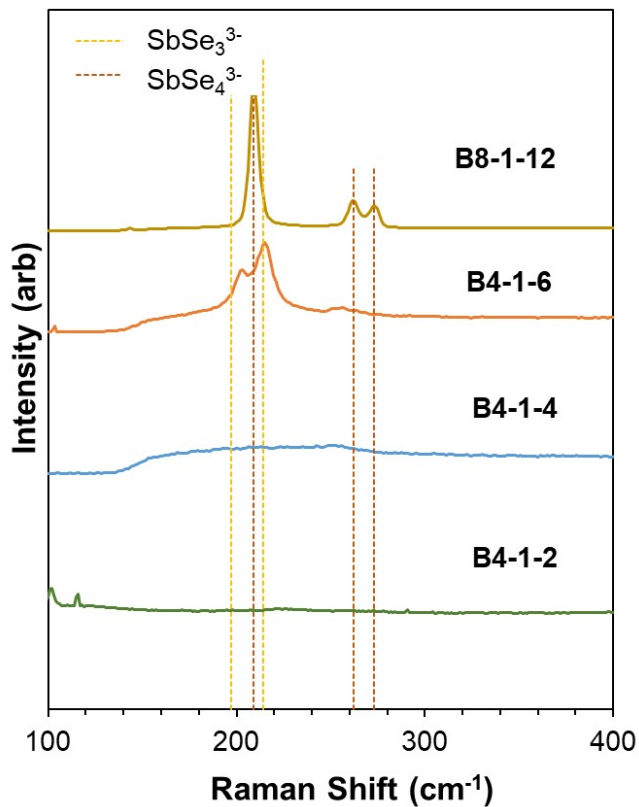

Figure S7 Raman spectra of  $\text{Na}_3\text{SbSe}_4$  precipitates recovered at RT from colorless Se solution (B).

We conducted Raman analysis to determine various molecular bonding in selenide products of solution B. The 100-400  $\text{cm}^{-1}$  region was probed as it is the range of interest for selenide compounds. The spectra from B4-1-2 and B4-1-4 samples do not show any peaks correlated to Raman active vibrational modes of ternary selenide. Alternatively, vibrational modes of  $\text{SbSe}_4^{3-}$  and  $\text{SbSe}_3^{3-}$  units are observed in the product recovered from the B4-1-6 reaction. The bands at 205 and 214  $\text{cm}^{-1}$  are assigned to stretching modes of  $[\text{SbSe}_3]$  indicating a red shift compared to the spectrum of single crystals of  $\text{Na}_3\text{SbSe}_3$  possibly due to a change in the molecular environment of the mixed ternary phase and the presence of unremoved solvated molecules.<sup>3,4</sup> The bands at 209, 262, and 273 are attributed to stretching modes of  $\text{SbSe}_4$  polyanions.<sup>5,6</sup> In complete agreement with the diffraction results, the B8-1-12 product exhibits pure  $\text{SbSe}_4$  polyanions without any other impurities.

#### Figure S8 $\text{Na}_3\text{SbSe}_4$ reaction using $\text{Na}_2\text{Se}_2$ precursor

To probe the applicability of  $\text{Na}_2\text{Se}_2$  as a Se source in the ternary selenides' synthesis, we used a Se solution precursor mostly containing  $\text{Se}_2^{2-}$  anions in ethanol. For this reaction, an ethanolic solution of  $\text{Na}_2\text{Se}_2$  (Figure S8a) was produced by the reduction of Se with  $\text{NaBH}_4$  in the presence of sodium ethoxide<sup>7</sup> which was further reacted with  $\text{SbBr}_3$  and  $\text{NaOH}$  with  $[\text{Se}]: [\text{Sb}]: [\text{NaOH}] = 4: 1: 6$  stoichiometry as detailed in the Experimental Section. XRD pattern of the recovered product (Figure S7b) shows a major  $\text{Na}_3\text{SbSe}_4$  phase with a minor  $\text{NaSbSe}_2$  phase implying the possibility of ternary reaction with only diselenide anions.

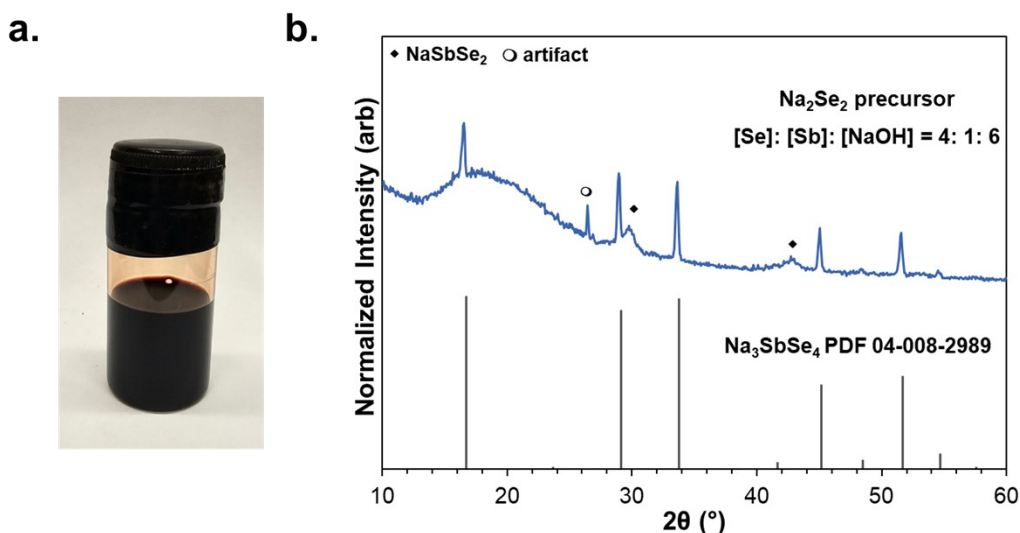

Figure S8 a. Photograph of  $\text{Na}_2\text{Se}_2$  solution in ethanol. b. XRD pattern of product from  $\text{Na}_2\text{Se}_2$  reaction with  $\text{SbBr}_3$  and  $\text{NaOH}$  using  $[\text{Se}]: [\text{Sb}]: [\text{NaOH}] = 4: 1: 6$  stoichiometry.

#### Figure S9 XRD analysis of $\text{Na}_3\text{SbSe}_4$ reaction with no basic agent.

In these reactions, we observed that  $\text{NaOH}$  plays a crucial role in forming the desired 314 phase. The excess of  $\text{NaOH}$  promotes the oxidation of antimony from (III) state in  $\text{NaSbSe}_2/\text{Na}_3\text{SbSe}_3$  to the (V) state in  $\text{Na}_3\text{SbSe}_4$ . The oxidation of Sb (III) to Sb (V) requires simultaneous reduction of certain species in the system to maintain the charge neutrality. Herein, we can assume the reduction of  $\text{Se}_2^{2-}$  to  $\text{Se}_2$  in the absence

of H<sub>2</sub> evolution is the key factor that results in the oxidation of Sb (III) to Sb(V). Interestingly, a ternary reaction with no NaOH resulted in a highly pure NaSbSe<sub>2</sub> further demonstrating the role of the basic agent in the oxidation of Sb (Figure S9).

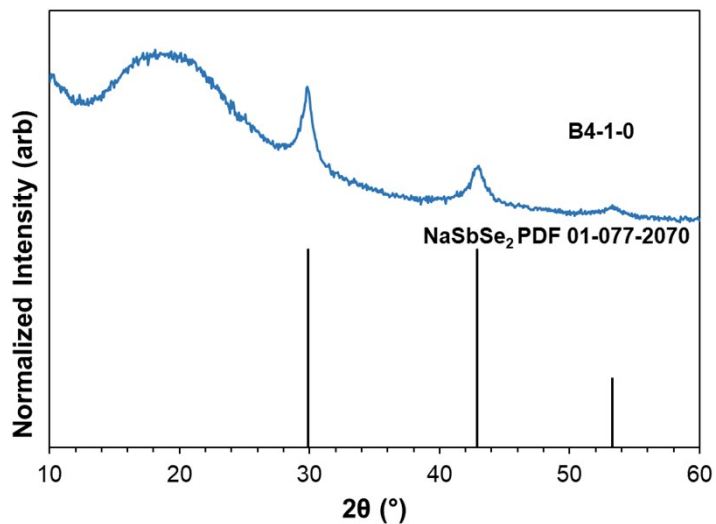

Figure S9 XRD patterns of ternary reaction precipitate with no basic agent added (B4-1-0): [NaHSe]: [Sb]: [NaOH] = 4: 1: 0 in EtOH recovered at RT.

Figure S10 Lattice structure of Na<sub>3</sub>SbSe<sub>4</sub>

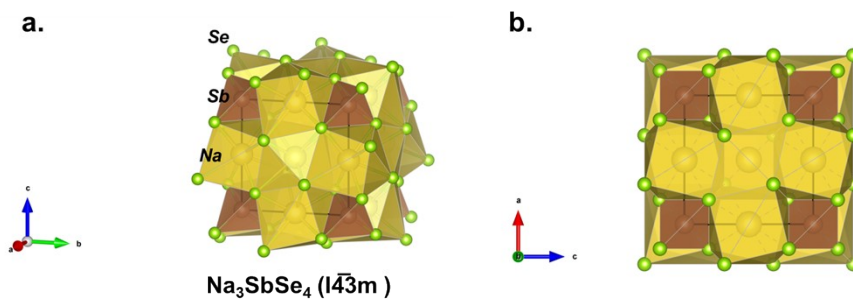

Figure S10 a. The crystal lattice structure of Na<sub>3</sub>SbSe<sub>4</sub>, b. projected along the b-axis.

Figure S11 EDAX Mapping of  $\text{Na}_3\text{SbSe}_4$

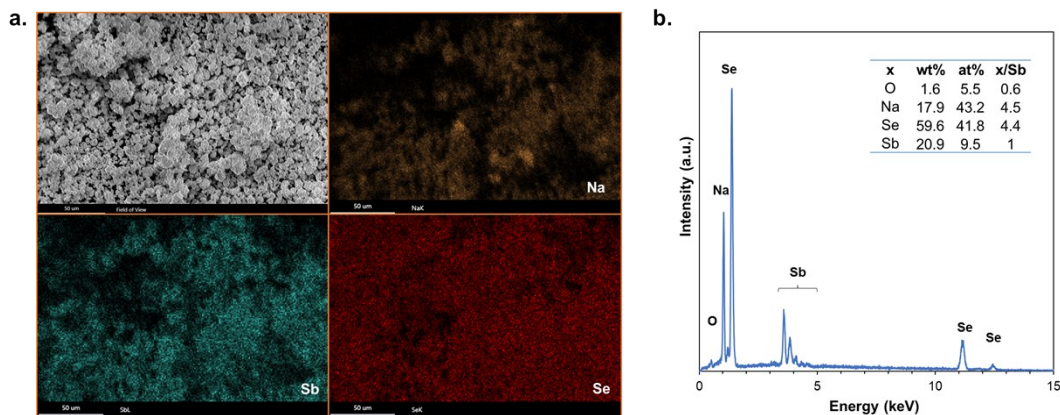

Figure S11 a. SEM micrograph and EDAX elemental mapping of A8-1-12 sample. b. corresponding elemental composition of the  $\text{Na}_3\text{SbSe}_4$  sample recovered from EtOH at RT.

Figure S12 FTIR analysis of RT and heat-treated  $\text{Na}_3\text{SbSe}_4$

The IR spectra of  $\text{Na}_3\text{SbSe}_4$  recovered at RT and later annealed at 200 °C compared with pure EtOH signal. Most organic residues (C-H and O-H bonds) observed in the RT sample from the ethanolic solution are removed even though small traces of oxyselenide species at low wavenumbers are still present.

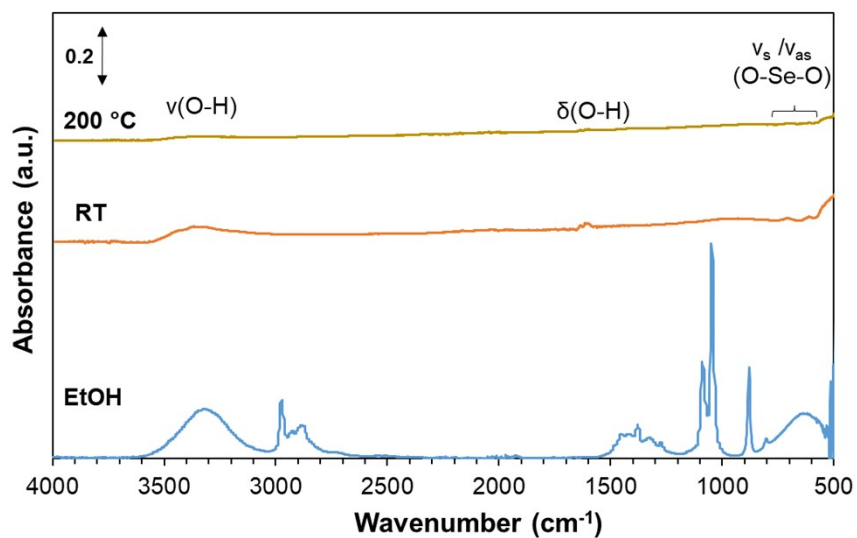

Figure S12 FTIR spectra of  $\text{Na}_3\text{SbSe}_4$  dried at RT and 200 °C compared with pure ethanol IR scan.



Figure S13 Electronic conductivity of  $\text{Na}_3\text{SbCh}_4$ .

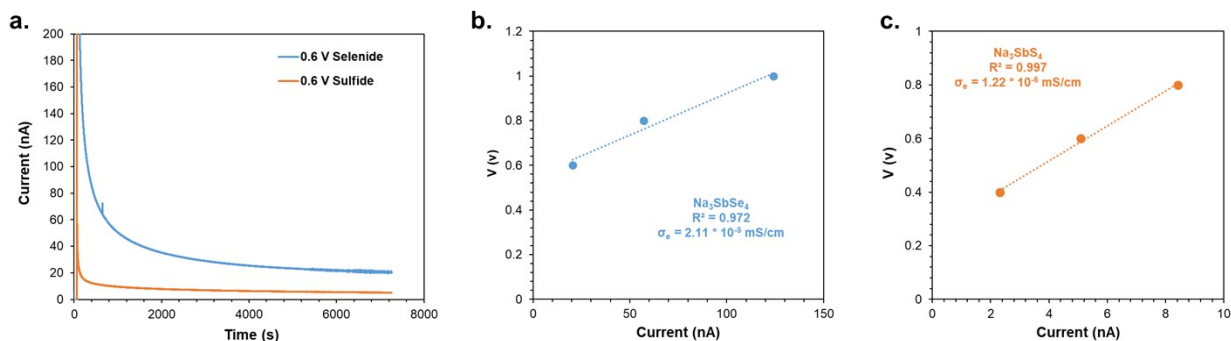

Figure S13 a. DC polarization curves of  $\text{Na}_3\text{SbCh}_4$  (Ch = S, Se) at 0.6 V. Electronic conductivity of b.  $\text{Na}_3\text{SbS}_4$ , and c.  $\text{Na}_3\text{SbSe}_4$  calculated from Ohm's law.

Figure S14 Raman analysis of  $\text{NaSbS}_2$

Raman spectra of the RT and annealed  $\text{NaSbS}_2$  samples are shown in Figure S14. The change in intensity and position of Raman peaks can provide useful information about the local structure of chemical bonding, relative change in order/disorder, and orientation of crystalline compounds.<sup>8</sup> The number of major Raman peaks observed here matches with the Medina-Gonzalez et al.<sup>9</sup> report; however, the peak positions at  $\sim 287$  and  $\sim 317 \text{ cm}^{-1}$  are slightly different from the  $\text{NaSbS}_2$  synthesized using the colloidal approach possibly due to differences in local structure induced by different synthesis methods and post-processing. The rise in intensity and narrowing of the observed peaks in the RT sample upon heat treatment/further indicates the structural phase change in  $\text{NaSbS}_2$  and higher local order in monoclinic polymorph.

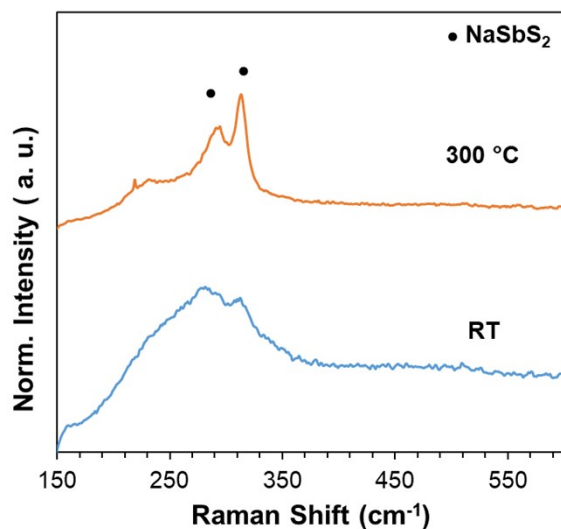

Figure 14 Raman spectra of  $\text{NaSbS}_2$  before and after annealing at  $300 \text{ }^\circ\text{C}$ .

Figure S15 Morphological analysis of NaSbS<sub>2</sub>

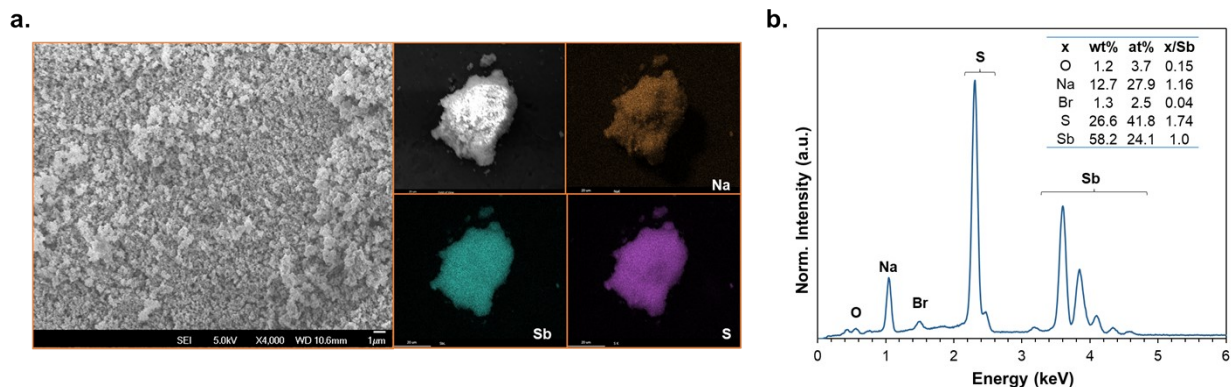

Figure S15 SEM and EDAX mapping of NaSbS<sub>2</sub> recovered from the “one-pot” reaction in EtOH at RT.

Figure S16 XRD and EDAX analysis of one-pot NaSbSe<sub>2</sub>

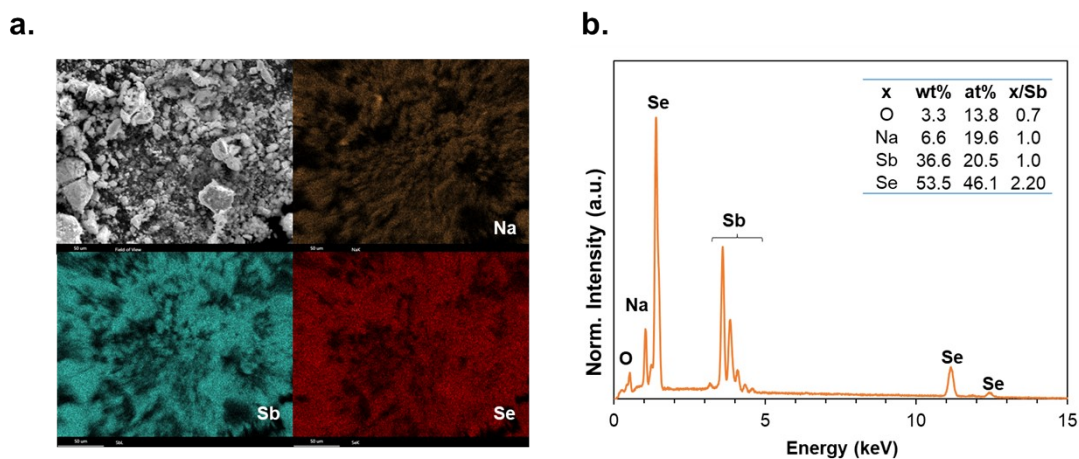

Figure S16 a. EDAX mapping, and b. corresponding elemental composition of NaSbSe<sub>2</sub> powder annealed at 300 °C.

### NaBiCh<sub>2</sub> (Ch= S, Se) Synthesis and Structural Characterization

To date, NaBiCh<sub>2</sub> (Ch = S, Se) has been synthesized using hydrothermal<sup>10–12</sup>, colloidal solution<sup>13–15</sup>, and high-temperature sintering<sup>16</sup> approaches. Even though binary chalcogenides exist in various crystal structures and offer different physiochemical properties, ternary chalcogenides offer additional degrees of freedom in adjusting their properties and performance for a given application; however, that also adds more complexity to the synthesis. Specifically, one of the challenging aspects in multinary chalcogenide synthesis is the tendency to form binary chalcogenide phases.<sup>14,17,18</sup> In this context, Bi<sub>2</sub>S<sub>3</sub> is the main impurity formed in the hydrothermal synthesis of NaBiS<sub>2</sub>.<sup>12,19</sup>

Our initial attempts to extend the one-pot approach to Bi-based materials resulted in a mixed binary and ternary phase as depicted in Figure S16a. However, the excess of sulfur and NaOH proved to stabilize the ternary phase while improving the crystallinity of the RT-recovered sample. Figure 8a compares the XRD profiles of reaction products with an excess of NaOH ([Na<sub>2</sub>S]: [Bi]: [NaOH] = 2: 1: 5, denoted as NBS2-1-

5) or without NaOH (NBS2-1-0) and excess of both Na<sub>2</sub>S and NaOH (NBS5-1-5). The RT product of the NBS2-1-0 sample is almost amorphous while the sample with excess NaOH shows broad peaks matching with cubic (Fm $\bar{3}$ m) NaBiS<sub>2</sub>. NBS5-1-5 exhibits the highest crystallinity recovered at RT indicating the impact of sulfur concentration on crystal growth. Annealing at 300 °C does not significantly change the crystallinity of pure NaBiS<sub>2</sub> in the NBS5-1-5 reaction. In cases of NBS2-1-0 and 2-1-5 results in a mixture of Bi, binary, and ternary sulfide, highlighting the impact of alkaline conditions in stabilizing the ternary compound. Bismuth salts such as Bi(NO<sub>3</sub>)<sub>3</sub> and BiCl<sub>3</sub> are reported to go through strong hydrolysis in aqueous solutions, decreasing the pH and neutralizing available alkali species. Hence, excess alkaline presence is needed to neutralize the formed acidity.<sup>19,20</sup> We presume excess Na<sub>2</sub>S/NaOH provides a similar impact in the ethanolic solution of Na<sub>2</sub>S and BiBr<sub>3</sub> by creating an alkaline condition that ultimately improves the solubility of intermediate Bi<sub>2</sub>S<sub>3</sub> and facilitates its reaction to generate NaBiS<sub>2</sub>. Additionally, it improves the crystal growth of ternary chalcogenides.

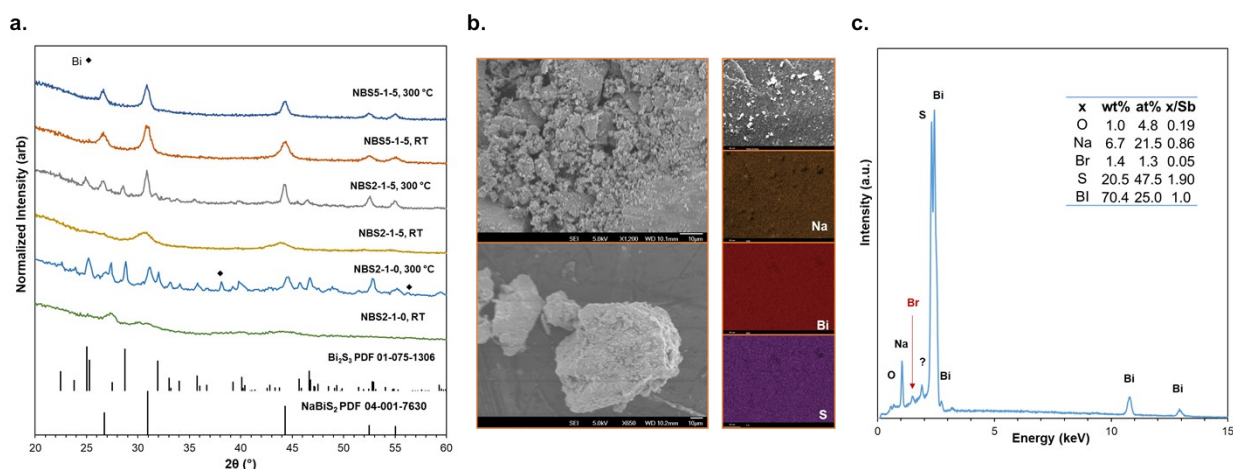

Figure S17 a. XRD patterns of NaBiS<sub>2</sub> products with different [Na<sub>2</sub>S]: [Bi]:[OH] concentrations. b. SEM micrograph, EDAX mapping, and c. the corresponding composition of NaBiS<sub>2</sub> annealed at 300 °C (NBS5-1-5, 300 °C).

SEM micrograph of annealed NaBiS<sub>2</sub> shows micron-sized agglomerates of various shapes (Figure 16a). It is important to note that size and morphology control in this reaction scheme is quite difficult without the use of any surfactant or capping agents. EDAX mapping and corresponding elemental composition (Figure 16c, d) exhibit a homogenous elemental distribution with Na/Bi = 0.86, and S/Bi = 1.90 molar ratios very close to the expected stoichiometric values. There is a small trace of bromine possibly from unremoved NaBr present despite vigorous H<sub>2</sub>O washing in the purification process.

Our efforts to synthesize NaBiSe<sub>2</sub> through similar concentration tuning of precursors resulted in a mixed phase of Bi<sub>2</sub>Se<sub>3</sub> and NaBiSe<sub>2</sub> (Figure S18). Additional studies utilizing other precursors or adjusting pH conditions are needed to optimize the reaction conditions and obtain pure selenide compounds.

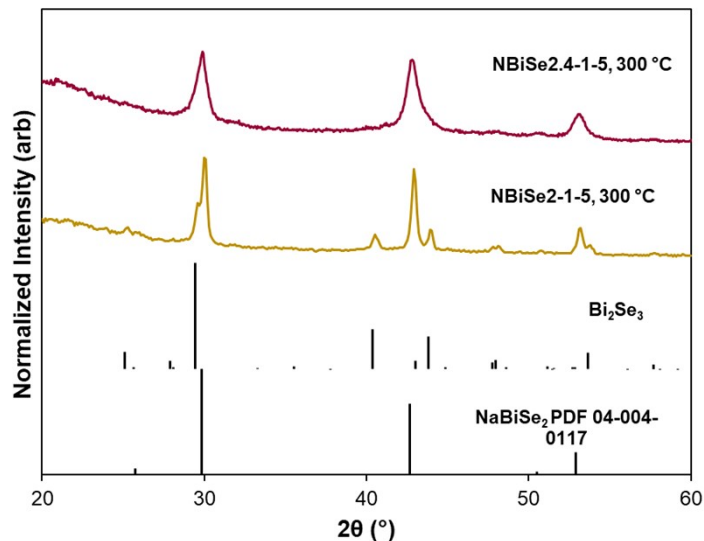

Figure S18 XRD patterns of NaBiSe<sub>2</sub> recovered from ethanol solution with various [Se]:[Bi]:[OH] ratios.

Table S1 Fitting results of EIS spectra of synthesized Na<sub>3</sub>SbS<sub>4</sub>.

Effective capacitance is calculated from the Brug equation<sup>21</sup>:  $C_{eff} = Q^{1/n} R^{1-n}$

| Sample                            | R <sub>1</sub> (Ω) | Q <sub>1</sub> (S/s <sup>n</sup> ) | n <sub>1</sub> | C <sub>1</sub> (F) | Q <sub>2</sub> (S/s <sup>n</sup> ) | n <sub>2</sub> |
|-----------------------------------|--------------------|------------------------------------|----------------|--------------------|------------------------------------|----------------|
| Na <sub>3</sub> SbS <sub>4</sub>  | 180.7              | 6.71E-6                            | 0.31           | 1.96E-12           | 4.21E-7                            | 0.87           |
| Na <sub>3</sub> SbSe <sub>4</sub> | 672.3              | 6.39E-7                            | 0.55           | 1.09E-9            |                                    |                |

Table S2 Summary of solution-phase synthesis of ternary chalcogenides

| Sample                       | Chalcogen precursor (Conc.)            | Pnictogen precursor (Conc.) | NaOH (Conc.) | Solvent   | Recovery temperature (°C) | Product                                                                        |
|------------------------------|----------------------------------------|-----------------------------|--------------|-----------|---------------------------|--------------------------------------------------------------------------------|
| Chloride-based NSbS (0.15 M) | Na <sub>2</sub> S (0.45 M), S (0.15 M) | SbCl <sub>3</sub> (0.15 M)  | 0            | MeOH-DMSO | RT                        | Na <sub>3</sub> SbS <sub>4</sub> (97.8%), NaSbS <sub>2</sub> (2.2%)            |
| Bromide-based NSbS           | Na <sub>2</sub> S (0.3M), S (0.1 M)    | SbBr <sub>3</sub> (0.1 M)   | 0            | EtOH      | RT, 150 °C                | Na <sub>3</sub> SbS <sub>4</sub> , NaSbS <sub>2</sub>                          |
| NaSbS <sub>2</sub> (Fm3m)    | Na <sub>2</sub> S (0.2 M)              | SbBr <sub>3</sub> (0.1 M)   | 0            | EtOH      | RT                        | NaSbS <sub>2</sub>                                                             |
| NaSbS <sub>2</sub> (C2/c)    | Na <sub>2</sub> S (0.24 M)             | SbBr <sub>3</sub> (0.1 M)   | 0            | EtOH      | 300 °C                    | NaSbS <sub>2</sub>                                                             |
| NBS2-1-0                     | Na <sub>2</sub> S (0.2 M)              | BiBr <sub>3</sub> (0.1 M)   | 0            | EtOH      | RT, 300 °C                | Bi <sub>2</sub> S <sub>3</sub> (major), NaBiS <sub>2</sub> (major), Bi (trace) |

|                     |                           |                            |        |      |            |                                                                       |
|---------------------|---------------------------|----------------------------|--------|------|------------|-----------------------------------------------------------------------|
| NBS2-1-5            | Na <sub>2</sub> S (0.2 M) | BiBr <sub>3</sub> (0.1 M)  | 0.5 M  | EtOH | RT, 300 °C | NaBiS <sub>2</sub> (major),<br>Bi <sub>2</sub> S <sub>3</sub> (minor) |
| NBS5-1-5            | Na <sub>2</sub> S (0.5 M) | BiBr <sub>3</sub> (0.1 M)  | 0.5 M  | EtOH | RT, 300 °C | NaBiS <sub>2</sub>                                                    |
| NaSbSe <sub>2</sub> | Colorless Se<br>(0.22 M)  | SbBr <sub>3</sub> (0.11 M) | 0.44 M | EtOH | RT, 300 °C | NaSbSe <sub>2</sub>                                                   |
| NBiSe2-1-5          | Colorless Se<br>(0.2 M)   | BiBr <sub>3</sub> (0.2M)   | 0.4 M  | EtOH | 300 °C     | NaBiSe <sub>2</sub> ,<br>Bi <sub>2</sub> Se <sub>3</sub> (trace)      |
| NBiSe2.4-1-5        | Colorless Se<br>(0.24 M)  | BiBr <sub>3</sub> (0.2M)   | 0.4 M  | EtOH | 300 °C     | NaBiSe <sub>2</sub> ,<br>Bi <sub>2</sub> Se <sub>3</sub> (trace),     |

Table S3 Summary of synthesis parameters and performance reports of Na<sub>3</sub>SbCh<sub>4</sub> (Ch= S, Se) in the literature.

| <b>Ternary SSE</b>                | <b>Synthesis method</b>                            | <b>Precursors</b>                                                       | <b>P<sub>fab</sub> (MPa)</b> | <b>Heat-treatment (°C)</b> | <b>σ<sub>Na+</sub> (mS/cm)</b> | <b>E<sub>a</sub> (eV)</b> | <b>Ref.</b> |
|-----------------------------------|----------------------------------------------------|-------------------------------------------------------------------------|------------------------------|----------------------------|--------------------------------|---------------------------|-------------|
| Na <sub>3</sub> SbS <sub>4</sub>  | Hydrate Purification                               | Na <sub>3</sub> SbS <sub>4</sub> ·9H <sub>2</sub> O                     | 320                          | 150                        | 1                              | 0.22                      | 22          |
| Na <sub>3</sub> SbS <sub>4</sub>  | Solid-state                                        | Na <sub>2</sub> S, Sb <sub>2</sub> S <sub>3</sub> , S                   | 370                          | 550                        | 1.10                           | 0.20                      | 2           |
|                                   | Dissolution-precipitation (MeOH, H <sub>2</sub> O) |                                                                         |                              | 500                        | 0.23                           | 0.37                      |             |
| Na <sub>3</sub> SbS <sub>4</sub>  | Solution (H <sub>2</sub> O)                        | Na <sub>2</sub> S, Sb <sub>2</sub> S <sub>3</sub> , S                   | 370                          | 200                        | 0.15                           | 0.35                      | 23          |
| Na <sub>3</sub> SbS <sub>4</sub>  | Solution (H <sub>2</sub> O)                        | Na <sub>2</sub> S, Sb <sub>2</sub> S <sub>3</sub> , S                   | 150                          | 720                        | 1.2                            | 0.24                      | 24          |
| Na <sub>3</sub> SbS <sub>4</sub>  | Solution (H <sub>2</sub> O)                        | Na <sub>2</sub> S·9H <sub>2</sub> O, Sb <sub>2</sub> S <sub>3</sub> , S | 140                          | 350                        | 0.12                           | -                         | 25          |
| Na <sub>3</sub> SbS <sub>4</sub>  | Solid-state                                        | Na <sub>2</sub> S, Sb <sub>2</sub> S <sub>3</sub> , S                   | 600                          | -                          | 0.98                           | 0.17                      | 26          |
| Na <sub>3</sub> SbS <sub>4</sub>  | Solid-state                                        | Na, Sb, S                                                               | 700                          | 400                        | 1.9                            | -                         | 27          |
| Na <sub>3</sub> SbS <sub>4</sub>  | Solution (H <sub>2</sub> O)                        | Na <sub>2</sub> S, Sb <sub>2</sub> S <sub>3</sub> , S                   | 150                          | 570                        | 0.35                           | 0.34                      | 28          |
| Na <sub>3</sub> SbSe <sub>4</sub> | Solid-state                                        | Na, Sb, Se                                                              | 650                          | 100                        | 0.85                           | 0.193                     | 29          |
| Na <sub>3</sub> SbSe <sub>4</sub> | Solid-state                                        | Na, Sb, Se                                                              | 700                          | 300                        | 3.7                            | 0.19                      | 6           |
| Na <sub>3</sub> SbSe <sub>4</sub> | Solution (EtOH)                                    | Se, NaBH <sub>4</sub> , Sb <sub>2</sub> Se <sub>3</sub> , NaOH          | 275                          | 200                        | 0.25                           | 0.11                      | 30          |

|                            |                   |                                                              |     |     |       |      |           |
|----------------------------|-------------------|--------------------------------------------------------------|-----|-----|-------|------|-----------|
| $\text{Na}_3\text{SbSe}_4$ | Solution (EDA-PT) | Na, Se, $\text{Sb}_2\text{Se}_3$ ,                           | 275 | 300 | 0.175 | 0.14 | 30        |
| $\text{Na}_3\text{SbS}_4$  | Solution (EtOH)   | $\text{Na}_2\text{S}$ , $\text{SbBr}_3$ , $\text{SnS}_2$ , S | 275 | RT  | 0.38  | 0.19 | This work |
| $\text{Na}_3\text{SbSe}_4$ | Solution (EtOH)   | Se, $\text{NaBH}_4$ , $\text{SbBr}_3$ , NaOH                 |     | RT  | 0.17  | 0.21 |           |

## References

- 1 S. P. Pinho and E. A. Macedo, Solubility of NaCl, NaBr, and KCl in water, methanol, ethanol, and their mixed solvents, *J Chem Eng Data*, 2005, **50**, 29–32.
- 2 A. Banerjee, K. H. Park, J. W. Heo, Y. J. Nam, C. K. Moon, S. M. Oh, S.-T. T. Hong and Y. S. Jung,  $\text{Na}_3\text{SbS}_4$ : A Solution Processable Sodium Superionic Conductor for All-Solid-State Sodium-Ion Batteries, *Angewandte Chemie - International Edition*, 2016, **55**, 9634–9638.
- 3 C. Pompe and A. Pfitzner,  $\text{Na}_3\text{SbSe}_3$ : Synthesis, crystal structure determination, raman spectroscopy, and ionic conductivity, *Z Anorg Allg Chem*, 2012, **638**, 2158–2162.
- 4 H. J. Breunig, S. Güleç, B. Krebs and M. Dartmann, Synthesis and Structure of  $(\text{MeSe})_3\text{Sb}$ , *Zeitschrift für Naturforschung B*, 1989, **44**, 1351–1354.
- 5 N. Ding, Y. Takabayashi, P. L. Solari, K. Prassides, R. J. Pcionek and M. G. Kanatzidis, Cubic gyroid frameworks in mesostructured metal selenides created from tetrahedral  $\text{Zn}^{2+}$ ,  $\text{Cd}^{2+}$ , and in  $3+$  ions and the  $[\text{SbSe}_4]^{3-}$  precursor, *Chemistry of Materials*, 2006, **18**, 4690–4699.
- 6 N. Wang, K. Yang, L. Zhang, X. Yan, L. Wang and B. Xu, Improvement in ion transport in  $\text{Na}_3\text{PSe}_4$ – $\text{Na}_3\text{SbSe}_4$  by Sb substitution, *J Mater Sci*, 2018, **53**, 1987–1994.
- 7 X. Yang, Q. Wang, Y. Tao and H. Xu, A Modified Method to Prepare Diselenides by the Reaction of Selenium with Sodium Borohydride, *J Chem Res*, 2002, **2002**, 160–161.
- 8 G. Gouadec and P. Colomban, Raman Spectroscopy of nanomaterials: How spectra relate to disorder, particle size and mechanical properties, *Progress in Crystal Growth and Characterization of Materials*, 2007, **53**, 1–56.
- 9 A. M. Medina-Gonzalez, P. Yox, Y. Chen, M. A. S. Adamson, B. A. Rosales, M. Svay, E. A. Smith, R. D. Schaller, K. Wu, A. J. Rossini, K. Kovnir and J. Vela, Solution-Grown Ternary Semiconductors: Nanostructuring and Stereoelectronic Lone Pair Distortions in I–V–VI<sub>2</sub> Materials, *Chemistry of Materials*, 2022, **34**, 7357–7368.
- 10 S. Kang, Y. Hong and Y. Jeon, A facile synthesis and characterization of sodium bismuth sulfide ( $\text{NaBiS}_2$ ) under hydrothermal condition, *Bull Korean Chem Soc*, 2014, **35**, 1887–1890.
- 11 P. Rong, S. Gao, H. Lu, S. Ren, M. Zhang, S. Jiao, Y. Zhang and J. Wang, Hierarchical Nanosheet-Based  $\text{NaBiS}_2$  Flowers for High-Performance and Self-Powered Broadband Photodetectors, *ACS Appl Nano Mater*, 2022, **5**, 11003–11010.
- 12 H. Fei, Z. Feng and X. Liu, Novel sodium bismuth sulfide nanostructures: a promising anode materials for sodium-ion batteries with high capacity, *Ionics (Kiel)*, 2015, **21**, 1967–1972.
- 13 B. A. Rosales, M. A. White and J. Vela, Solution-Grown Sodium Bismuth Dichalcogenides: Toward Earth-Abundant, Biocompatible Semiconductors, *J Am Chem Soc*, 2018, **140**, 3736–3742.

- 14 N. Kapuria, B. Nan, T. E. Adegoke, U. Bangert, A. Cabot, S. Singh and K. M. Ryan, Colloidal Synthesis of Multinary Alkali-Metal Chalcogenides Containing Bi and Sb: An Emerging Class of I–V–VI<sub>2</sub> Nanocrystals with Tunable Composition and Interesting Properties, *Chemistry of Materials*, 2023, **35**, 4810–4820.
- 15 C. Yang, Z. Wang, Y. Wu, Y. Lv, B. Zhou and W. H. Zhang, Synthesis, characterization, and photodetector application of alkali metal bismuth chalcogenide nanocrystals, *ACS Appl Energy Mater*, 2019, **2**, 182–186.
- 16 A. Baqais, N. Tymińska, T. Le Bahers and K. Takane, Optoelectronic Structure and Photocatalytic Applications of Na(Bi,La)S<sub>2</sub> Solid Solutions with Tunable Band Gaps, *Chemistry of Materials*, 2019, **31**, 3211–3220.
- 17 C. Behera, R. Samal, C. S. Rout, R. S. Dhaka, G. Sahoo and S. L. Samal, Synthesis of CuSbS<sub>2</sub> Nanoplates and CuSbS<sub>2</sub>-Cu<sub>3</sub>SbS<sub>4</sub> Nanocomposite: Effect of Sulfur Source on Different Phase Formation, *Inorg Chem*, 2019, **58**, 15291–15302.
- 18 C. Coughlan, M. Ibáñez, O. Dobrozhan, A. Singh, A. Cabot and K. M. Ryan, Compound Copper Chalcogenide Nanocrystals, *Chem Rev*, 2017, **117**, 5865–6109.
- 19 H. Wang, Z. Xie, X. Wang and Y. Jia, NaBiS<sub>2</sub> as a Novel Indirect Bandgap Full Spectrum Photocatalyst: Synthesis and Application, *Catalysts*, 2020, **10**, 413.
- 20 H. Wang, J. Ding, H. Xu, L. Qiao, X. Wang and Y. Lin, One-Pot Synthesis of BiCuSO Nanosheets under Ambient Atmosphere as Broadband Spectrum Photocatalyst, *Nanomaterials*, 2019, **9**, 540.
- 21 G. J. Brug, A. L. G. van den Eeden, M. Sluyters-Rehbach and J. H. Sluyters, The analysis of electrode impedances complicated by the presence of a constant phase element, *Journal of Electroanalytical Chemistry*, 1984, **176**, 275–295.
- 22 H. Wang, Y. Chen, Z. D. Hood, G. Sahu, A. S. Pandian, J. K. Keum, K. An and C. Liang, An Air-Stable Na<sub>3</sub>SbS<sub>4</sub> Superionic Conductor Prepared by a Rapid and Economic Synthetic Procedure, *Angewandte Chemie - International Edition*, 2016, **55**, 8551–8555.
- 23 T. W. Kim, K. H. Park, Y. E. Choi, J. Y. Lee and Y. S. Jung, Aqueous-solution synthesis of Na<sub>3</sub>SbS<sub>4</sub> solid electrolytes for all-solid-state Na-ion batteries, *J Mater Chem A Mater*, 2018, **6**, 840–844.
- 24 S. Yubuchi, A. Ito, N. Masuzawa, A. Sakuda, A. Hayashi and M. Tatsumisago, Aqueous solution synthesis of Na<sub>3</sub>SbS<sub>4</sub>-Na<sub>2</sub>WS<sub>4</sub> superionic conductors, *J Mater Chem A Mater*, 2020, **8**, 1947–1954.
- 25 H. Cao, M. Yu, L. Zhang, Z. Zhang, X. Yan, P. Li and C. Yu, Stabilizing Na<sub>3</sub>SbS<sub>4</sub>/Na interface by rational design via Cl doping and aqueous processing, *J Mater Sci Technol*, 2021, **70**, 168–175.
- 26 W. Weng, G. Liu, Y. Li, L. Shen and X. Yao, Tungsten and oxygen co-doped stable tetragonal phase Na<sub>3</sub>SbS<sub>4</sub> with ultrahigh ionic conductivity for all-solid-state sodium batteries, *Appl Mater Today*, 2022, **27**, 101448.
- 27 L. Li, R. Xu, L. Zhang, Z. Zhang, M. Yang, D. Liu, X. Yan and A. Zhou, O-Tailored Microstructure-Engineered Interface toward Advanced Room Temperature All-Solid-State Na Batteries, *Adv Funct Mater*, , DOI:10.1002/adfm.202203095.
- 28 H. Gamo, N. H. H. Phuc, H. Muto and A. Matsuda, Effects of Substituting S with Cl on the Structural and Electrochemical Characteristics of Na<sub>3</sub>SbS<sub>4</sub> Solid Electrolytes, *ACS Appl Energy Mater*, 2021, **4**, 6125–6134.
- 29 S. Xiong, Z. Liu, H. Rong, H. Wang, M. McDaniel and H. Chen, Na<sub>3</sub>SbSe<sub>4</sub>-xS<sub>x</sub> as Sodium

- Superionic Conductors, *Sci Rep*, 2018, **8**, 2–8.
- 30 S. A. Vaselabadi, K. Palmer, W. H. Smith and C. A. Wolden, Scalable Synthesis of Selenide Solid-State Electrolytes for Sodium-Ion Batteries, *Inorg Chem*, 2023, **62**, 17102–17114.
